# Supplementary material for: Enhancement of Anti-Tumoral Properties of Paclitaxel Nano-Crystals by Conjugation of Folic Acid to Pluronic F127: Formulation Optimization, In Vitro and In Vivo Study
Source: MDPI journal article supplement (doi:10.3390/molecules27227914), 2022-11-16
Supplement: s1 [file s1]

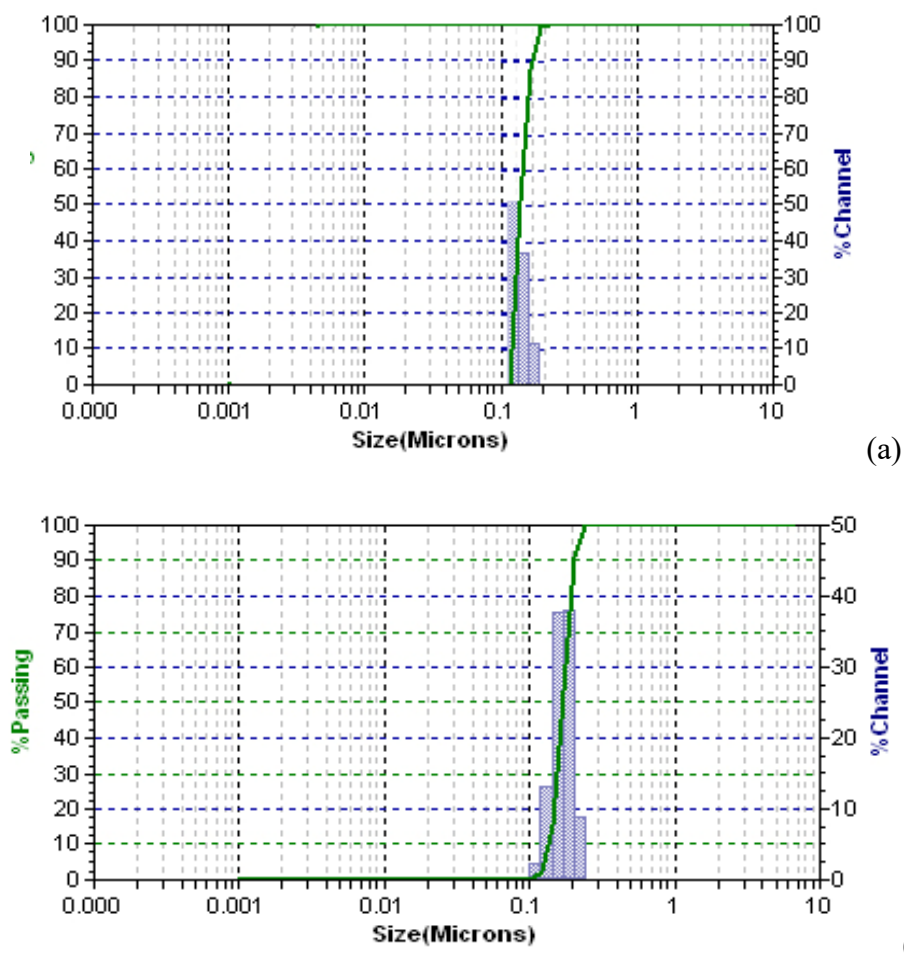

**Figure S1.** Particle size distribution of (a) O-PT-NC and (b) O-PT-NC-Folate.

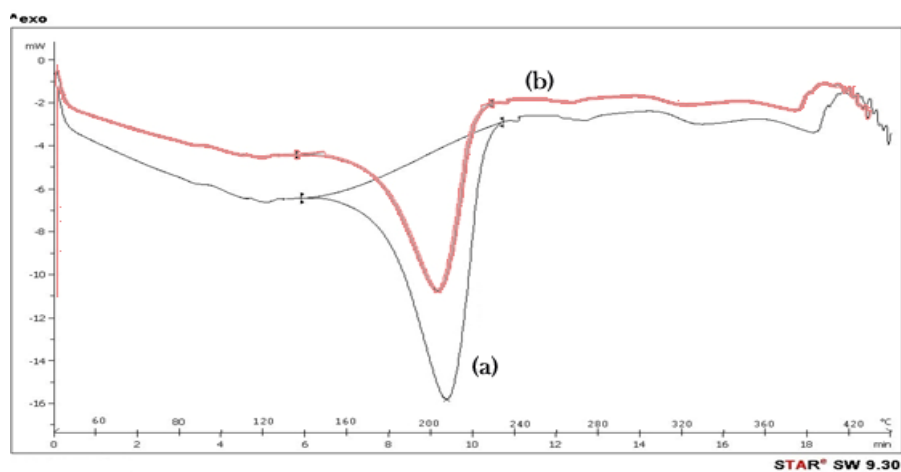

**Figure S2.** DSC thermogram of (a) Pure PT and (b) O-PT-NC.
